# Supplementary material for: General dental practitioners’ perceptions of, and attitudes towards, improving patient safety through a multidisciplinary approach to the prevention of medication-related osteonecrosis of the jaw (MRONJ): a qualitative study in the North East of England
Source: PubMed Central journal article supplement — BMJ Open. 2019 Jun 17;9(6):e029951. doi: 10.1136/bmjopen-2019-029951 (PMC6597093; doi:10.1136/bmjopen-2019-029951), 2019-06-17
Supplement: bmjopen-2019-029951.reviewer_comments.pdf [file bmjopen-2019-029951.reviewer_comments.pdf]

## PEER REVIEW HISTORY

BMJ Open publishes all reviews undertaken for accepted manuscripts. Reviewers are asked to complete a checklist review form (<http://bmjopen.bmj.com/site/about/resources/checklist.pdf>) and are provided with free text boxes to elaborate on their assessment. These free text comments are reproduced below.

### ARTICLE DETAILS

|                            |                                                                                                                                                                                                                                                               |
|----------------------------|---------------------------------------------------------------------------------------------------------------------------------------------------------------------------------------------------------------------------------------------------------------|
| <b>TITLE (PROVISIONAL)</b> | General dental practitioners' perceptions of and attitudes towards, improving patient safety through a multidisciplinary approach to the prevention of Medication-Related Osteonecrosis of the Jaw (MRONJ). A qualitative study in the North East of England. |
| <b>AUTHORS</b>             | Sturrock, Andrew; Preshaw, Philip; Hayes, Catherine; Wilkes, Scott                                                                                                                                                                                            |

### VERSION 1 - REVIEW

|                        |                                                                                                                                                      |
|------------------------|------------------------------------------------------------------------------------------------------------------------------------------------------|
| <b>REVIEWER</b>        | Sonita Koshal<br>Oral surgery department Eastman Dental Hospital university<br>College London Hospitals Trust 256 Gray's Inn road London<br>Wc1X 8LD |
| <b>REVIEW RETURNED</b> | 14-Mar-2019                                                                                                                                          |

|                         |                                                                                                          |
|-------------------------|----------------------------------------------------------------------------------------------------------|
| <b>GENERAL COMMENTS</b> | A great summary of the problems facing MRONJ and the GDP. A good education point for dentists and medics |
|-------------------------|----------------------------------------------------------------------------------------------------------|

|                        |                                              |
|------------------------|----------------------------------------------|
| <b>REVIEWER</b>        | Olga Di Fede<br>University of Palermo, Italy |
| <b>REVIEW RETURNED</b> | 14-Mar-2019                                  |

|                         |                                                   |
|-------------------------|---------------------------------------------------|
| <b>GENERAL COMMENTS</b> | With my compliments.<br>I appreciate it very much |
|-------------------------|---------------------------------------------------|
