# Supplementary material for: General dental practitioners’ perceptions of, and attitudes towards, improving patient safety through a multidisciplinary approach to the prevention of medication-related osteonecrosis of the jaw (MRONJ): a qualitative study in the North East of England
Source: PubMed Central journal article supplement — BMJ Open. 2019 Jun 17;9(6):e029951. doi: 10.1136/bmjopen-2019-029951 (PMC6597093; doi:10.1136/bmjopen-2019-029951), 2019-06-17
Supplement: bmjopen-2019-029951supp002.pdf [file bmjopen-2019-029951supp002.pdf]

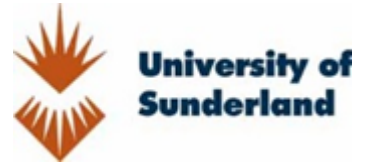

Mr Andrew Sturrock  
School of Pharmacy and Pharmaceutical Sciences  
Faculty of Health Sciences and Wellbeing  
Sciences Complex  
City Campus  
Chester Road  
University of Sunderland  
SR1 3SD  
Email: [andrew.sturrock@sunderland.ac.uk](mailto:andrew.sturrock@sunderland.ac.uk)  
Tel: 01915152448

TITLE FIRST SURNAME  
ADDRESS LINE 1  
ADDRESS LINE 2  
POST CODE

DATE

Dear [TITLE] [FIRST NAME] [LAST NAME],

My name is Andrew Sturrock; I am a Principal Lecturer in Pharmacy Practice at the University of Sunderland. I am writing to you as an invitation to take part in a research project that I am running in conjunction with Scott Wilkes, Professor of General Practice and Primary Care.

Please find enclosed the participant information sheet, outlining the background to the study and what is required of participants.

Participation can be either in person at your practice or via a scheduled telephone appointment. If you would like to take part in the study please contact me via email or telephone at the above address or complete and return the response form in the prepaid envelope included with this letter.

Yours faithfully

Andrew Sturrock  
Principal Lecturer– Pharmacy Practice

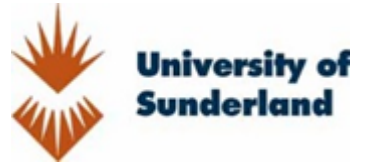

I would like find out more about the **MRONJ-GDP** study and I am happy for a member of the research team to contact me

**Contact details** (*Please enter your contact details below*)

Title: \_\_\_\_\_ Dr/Mr/Mrs/Ms/Miss (*please delete as appropriate*)

Name: \_\_\_\_\_

Telephone contact number: \_\_\_\_\_

A convenient time to call is: \_\_\_\_\_ Between \_\_\_\_\_ and \_\_\_\_\_

**Please return this slip in the envelope provided. A member of research team will contact you on the contact number provided above.**
