# Supplementary material for: General dental practitioners’ perceptions of, and attitudes towards, improving patient safety through a multidisciplinary approach to the prevention of medication-related osteonecrosis of the jaw (MRONJ): a qualitative study in the North East of England
Source: PubMed Central journal article supplement — BMJ Open. 2019 Jun 17;9(6):e029951. doi: 10.1136/bmjopen-2019-029951 (PMC6597093; doi:10.1136/bmjopen-2019-029951), 2019-06-17
Supplement: bmjopen-2019-029951supp003.pdf [file bmjopen-2019-029951supp003.pdf]

## **MRONJ-GDP Participant Information Sheet**

### **Study title:**

The multidisciplinary approach to the prevention of Medication-Related Osteonecrosis of the Jaw (MRONJ). A qualitative study into the attitudes and perceptions of general dental practitioners. (MRONJ-GDP)

### **What is the purpose of this study?**

- To explore the attitudes towards and perceptions of general dental practitioners, on the risks of medication-related osteonecrosis of the jaw.
- To explore the attitudes towards and perceptions of general dental practitioners on patient counselling and referral to a dental professional, by general medical practitioners and community pharmacists, for patients both newly started and established on medications associated with MRONJ
- To explore any perceived barriers or enablers to optimising the management of this patient group.

### **Who can take part?**

General dental practitioners, registered with the General Dental Council.

### **Do I have to take part and can I change my mind?**

Participation is entirely voluntary. If you change your mind about taking part in the study, you can withdraw at any point during the session without giving a reason and without penalty. Once the anonymised transcripts have been produced you will not be able to withdraw from the study. After the interview has been completed audio recording will be transcribed within 7 days.

### **What will happen to me if I take part?**

We would like your help with this study by asking you to talk to one of our team members for about an hour. We will audio record this conversation so that it is easier for us to make notes later about what was said. The interview can take place in person or via telephone, at your practice, at the University of Sunderland, or we can come to your home to talk to you. The researcher will ask you a series of questions in relation to the study title and your experiences in practice, from which there are absolutely no right or wrong answers. Your answers may lead to further discussion around any point or topics raised.

### **What are the possible disadvantages and risks of taking part?**

We don't think that there are any risks associated with taking part in this study.

### **What if something goes wrong?**

If you change your mind about participation, please contact me by email to cancel your participation. If you feel unhappy about the conduct of the study, please contact me immediately or the Chairperson of the University of Sunderland Research Ethics Group,

## MRONJ-GDP Participant Information Sheet

whose contact details are given below.

### Will my taking part in this study be kept confidential?

Participation in this study will be kept confidential. No personally identifiable information will be included in any write up or publication; a non-identifiable participant code will be used against any quotes provided, the first participant will be given the code D1, the numerical value will change with each subsequent participant e.g. D2, D3 etc.

A list of participants and signed consent forms will be stored securely by the principle investigator for a period of up to 2 years. Audio recordings and transcripts will be stored securely by the principle investigator for a period of up to 6 years. Access will be restricted to the research team and persons authorised by the University for Quality Assurance purposes.

### What will happen to the results of MAP-BRONJ?

If suitable, the results may be presented at academic conferences and/or written up for publication in peer reviewed academic journals. A summary of the results will be made available to participants if you choose to receive a copy.

### Who is organising and funding the research?

The research is being done by a research team at the University of Sunderland. The Chief Investigator for the project is Andrew Sturrock. His title is 'Principal Lecturer' and he is based in the School of Pharmacy and Pharmaceutical Sciences.

This project has received no external funding.

### Who has reviewed the study?

The University of Sunderland Research Ethics Group has reviewed and approved the study.

Contact for further information:

Doctor John Fulton (Chair of the University of Sunderland Research Ethics Group, University of Sunderland) Email: [john.fulton@sunderland.ac.uk](mailto:john.fulton@sunderland.ac.uk) Phone: 0191 515 2529

### Who can I contact if I have questions about MRONJ-GDP?

If you have any questions, we would like you to get in touch with us. You can do this by telephoning us on 0191 5152448 or you can email us on [andrew.sturrock@sunderland.ac.uk](mailto:andrew.sturrock@sunderland.ac.uk)

### What should I do if I want to take part?

If you don't have any questions and would like to take part, please can you fill in the **Response Form** and send it to us. Please let us know the best way for us to get in touch with you. We don't know how many practitioners will want to help us so we might find we have too many and we may not need to ask for your help.

Once we have your form, someone from the MAP-BRONJ team will get in touch with you

## **MRONJ-GDP Participant Information Sheet**

and let you know if we do need your help or not. If we do they will arrange the best time and place for you to meet and talk to us.

Thank you for taking the time to read this information.
